# Supplementary material for: Implementation of a national HIV pre-exposure prophylaxis service is associated with changes in characteristics of people with newly diagnosed HIV: a retrospective cohort study
Source: HighWire-hosted journal article supplement (doi:10.1136/sextrans-2020-054732), 2021-01-13
Supplement: sextrans-2020-054732supp001_data_supplement.pdf [file sextrans-2020-054732supp001_data_supplement.pdf]

**Table S1: Socio-demographic, HIV acquisition and Sexual Health characteristics of individuals diagnosed with HIV: comparisons made by whether infection was 'potentially-preventable' with the implemented PrEP model**

| <b>COHORT DIVIDED BY WHETHER INFECTIONS WERE 'POTENTIALLY-PREVENTABLE'</b> |               |       |                     |                           |        |                     |                               |       |                     |          |
|----------------------------------------------------------------------------|---------------|-------|---------------------|---------------------------|--------|---------------------|-------------------------------|-------|---------------------|----------|
|                                                                            | All diagnosed |       |                     | 'Potentially-preventable' |        |                     | Not 'potentially-preventable' |       |                     | P value* |
|                                                                            | Number        | %     | Confidence Interval | Number                    | %      | Confidence Interval | Number                        | %     | Confidence Interval |          |
| <b>Total in cohort</b>                                                     | <b>615</b>    |       |                     | <b>49</b>                 |        |                     | <b>566</b>                    |       |                     |          |
| <b>PATIENT DEMOGRAPHICS</b>                                                |               |       |                     |                           |        |                     |                               |       |                     |          |
| <b>Gender</b>                                                              |               |       |                     |                           |        |                     |                               |       |                     | <0.001   |
| Male                                                                       | 484           | 78.7% | 75.3-81.8%          | 49                        | 100.0% | 92.7-100%           | 435                           | 76.9% | 73.2-80.1%          | <0.001   |
| Female                                                                     | 131           | 21.3% | 18.2-24.7%          | 0                         | 0.0%   | 0.0-7.3%            | 131                           | 23.1% | 19.9-26.8%          | <0.001   |
| <b>Age in years</b>                                                        |               |       |                     |                           |        |                     |                               |       |                     | 0.004    |
| <40                                                                        | 344           | 55.9% | 52.0-59.8%          | 37                        | 75.5%  | 61.9-85.4%          | 307                           | 54.2% | 50.1-58.3%          | 0.004    |
| ≥40                                                                        | 271           | 44.1% | 40.2-48.0%          | 12                        | 24.5%  | 14.6-38.1%          | 259                           | 45.8% | 41.7-49.9%          | 0.004    |
| <b>Ethnicity</b>                                                           |               |       |                     |                           |        |                     |                               |       |                     | 0.004**  |
| White British                                                              | 453           | 73.7% | 70.0-77.0%          | 38                        | 77.6%  | 64.1-87.0%          | 415                           | 73.3% | 69.5-76.8%          | -        |
| White other                                                                | 48            | 7.8%  | 5.9-10.2%           | 9                         | 18.4%  | 10.0-31.4%          | 39                            | 6.9%  | 5.1-9.3%            | -        |
| Black African                                                              | 67            | 10.9% | 8.7-13.6%           | 0                         | 0.0%   | 0.0-7.3%            | 67                            | 11.8% | 9.4-14.8%           | 0.010    |
| Any other ethnicity                                                        | 33            | 5.4%  | 3.8-7.4%            | 2                         | 4.1%   | 1.1-13.7%           | 31                            | 5.5%  | 3.9-7.7%            | -        |
| Not known                                                                  | 14            | 2.3%  | 1.4-3.8%            | 0                         | 0.0%   | 0.0-7.3%            | 14                            | 2.5%  | 1.5-4.1%            | -        |
| <b>Area of residence</b>                                                   |               |       |                     |                           |        |                     |                               |       |                     | 0.156    |
| Urban health board (contains a city with population >100,000 people)       | 449           | 73.0% | 69.4-76.4%          | 40                        | 81.6%  | 68.6-90.0%          | 409                           | 72.3% | 68.4-75.8%          | -        |
| Rural health board                                                         | 166           | 27.0% | 23.6-30.6%          | 9                         | 18.4%  | 10.0-31.4%          | 157                           | 27.7% | 24.2-31.6%          | -        |
| <b>Scottish Index of Multiple Deprivation</b>                              |               |       |                     |                           |        |                     |                               |       |                     | 0.248**  |
| 1 (most deprived)                                                          | 219           | 35.6% | 31.9-39.5%          | 11                        | 22.4%  | 13.0-35.9%          | 208                           | 36.7% | 32.9-40.8%          | -        |
| 2                                                                          | 123           | 20.0% | 17.0-23.3%          | 11                        | 22.4%  | 13.0-35.9%          | 112                           | 19.8% | 16.7-23.3%          | -        |

|                                                                                   |     |       |            |    |        |            |     |       |            |          |
|-----------------------------------------------------------------------------------|-----|-------|------------|----|--------|------------|-----|-------|------------|----------|
| 3                                                                                 | 92  | 15.0% | 12.4-18.0% | 10 | 20.4%  | 11.5-33.6% | 82  | 14.5% | 11.8-17.6% | -        |
| 4                                                                                 | 80  | 13.0% | 10.6-15.9% | 7  | 14.3%  | 7.1-26.7%  | 73  | 12.9% | 10.4-15.9% | -        |
| 5 (least deprived)                                                                | 75  | 12.2% | 9.8-15.0%  | 9  | 18.4%  | 10.0-31.4% | 66  | 11.7% | 9.3-14.6%  | -        |
| Unknown                                                                           | 26  | 4.2%  | 2.9-6.1%   | 1  | 2.0%   | 0.4-10.7%  | 25  | 4.4%  | 3.0-6.4%   | -        |
| <b>HIV ACQUISITION</b>                                                            |     |       |            |    |        |            |     |       |            |          |
| <b>Route of HIV transmission</b>                                                  |     |       |            |    |        |            |     |       |            | <0.001** |
| Heterosexual sex                                                                  | 191 | 31.1% | 27.5-34.8% | 0  | 0.0%   | 0.0-7.3%   | 191 | 33.7% | 30.0-37.7% | <0.001   |
| Sex between men                                                                   | 300 | 48.8% | 44.8-52.7% | 49 | 100.0% | 92.7-100%  | 251 | 44.3% | 40.3-48.4% | <0.001   |
| Intravenous drug use                                                              | 102 | 16.6% | 13.9-19.7% | 0  | 0.0%   | 0.0-7.3%   | 102 | 18.0% | 15.1-21.4% | <0.001   |
| Other (inc blood/tissue products and mother to child transmission)                | 7   | 1.1%  | 0.6-2.3%   | 0  | 0.0%   | 0.0-7.3%   | 7   | 1.2%  | 0.6-2.5%   | -        |
| Unknown                                                                           | 15  | 2.4%  | 1.5-4.0%   | 0  | 0.0%   | 0.0-7.3%   | 15  | 2.7%  | 1.6-4.3%   | -        |
| <b>Country of exposure</b>                                                        |     |       |            |    |        |            |     |       |            | 0.203**  |
| Scotland                                                                          | 416 | 67.6% | 63.8-71.2% | 39 | 79.6%  | 66.4-88.5% | 377 | 66.6% | 62.6-70.4% | -        |
| Rest of UK                                                                        | 38  | 6.2%  | 4.5-8.4%   | 2  | 4.1%   | 1.1-13.7%  | 36  | 6.4%  | 4.6-8.7%   | -        |
| European Region                                                                   | 36  | 5.9%  | 4.3-8.0%   | 3  | 6.1%   | 2.1-16.5%  | 33  | 5.8%  | 4.2-8.1%   | -        |
| Outwith European region                                                           | 120 | 19.5% | 16.6-22.8% | 5  | 10.2%  | 4.4-21.8%  | 115 | 20.3% | 17.2-23.8% | -        |
| Unknown                                                                           | 5   | 0.8%  | 0.3-1.9%   | 0  | 0.0%   | 0.0-7.3%   | 5   | 0.9%  | 0.4-2.1%   | -        |
| <b>SEXUAL HEALTH DATA</b>                                                         |     |       |            |    |        |            |     |       |            |          |
| <b>Documented to have met PrEP eligibility criteria at sexual health services</b> |     |       |            |    |        |            |     |       |            | <0.001** |
| Met eligibility criteria                                                          | 79  | 12.8% | 10.4-15.7% | 49 | 100.0% | 92.7-100%  | 30  | 5.3%  | 3.7-7.5%   | <0.001   |
| Eligibility criteria 1-3 not met                                                  | 124 | 20.2% | 17.2-23.5% | 0  | 0.0%   | 0.0-7.3%   | 124 | 21.9% | 18.7-25.5% | <0.001   |
| Unknown (no sexual health service attendance)                                     | 412 | 67.0% | 63.2-70.6% | 0  | 0.0%   | 0.0-7.3%   | 412 | 72.8% | 69.0-76.3% | -        |
| <b>Ever prescribed PEPSE at SHS</b>                                               |     |       |            |    |        |            |     |       |            | <0.001   |
| Prescribed PEPSE previously                                                       | 19  | 3.1%  | 2.0-4.8%   | 12 | 24.5%  | 14.6-38.1% | 7   | 1.2%  | 0.6-2.5%   | <0.001   |

|                                                                                         |     |       |            |    |        |            |     |       |            |          |
|-----------------------------------------------------------------------------------------|-----|-------|------------|----|--------|------------|-----|-------|------------|----------|
| Not prescribed PEPSE previously                                                         | 596 | 96.9% | 95.2-98.0% | 37 | 75.5%  | 61.9-85.4% | 559 | 98.8% | 97.5-99.4% | <0.001   |
| <b>Recency of acquisition</b>                                                           |     |       |            |    |        |            |     |       |            | <0.001** |
| Recent (negative test within previous 12 months or according to avidity)                | 170 | 27.6% | 24.3-31.3% | 49 | 100.0% | 92.7-100%  | 121 | 21.4% | 18.2-24.9% | <0.001   |
| Established infection (according to avidity, and no negative HIV test within 12 months) | 394 | 64.1% | 60.2-67.8% | 0  | 0.0%   | 0.0-7.3%   | 394 | 69.6% | 65.7-73.3% | <0.001   |
| Unknown (according to avidity, and no negative HIV test within 12 months)               | 51  | 8.3%  | 6.4-10.7%  | 0  | 0.0%   | 0.0-7.3%   | 51  | 9.0%  | 6.9-11.7%  | -        |

\*P values compare characteristics of individuals using Chi-square tests. Where findings are statistically significant, the specific characteristics holding the significance also have the p value stated.

\*\*Unknown category excluded in the analysis
